# Supplementary material for: Modulation of Androgen Receptor Signaling in Hormonal Therapy-Resistant Prostate Cancer Cell Lines
Source: PLoS One. 2011 Aug 4;6(8):e23144. doi: 10.1371/journal.pone.0023144 (PMC3150397; doi:10.1371/journal.pone.0023144)
Supplement: Table S1 — List of SAM significant genes for PC346C cell line. (XLS) [file pone.0023144.s001.xls]

## Sheet: Table S1
Table S1 - List of SAM significant genes (q-value < 0.05) for PC346C cell line
GenBank ID	HUGO_Symbol	HUGO_Name	Stimuly	2log ratio	SAM q-value
NM_004117	FKBP5	FK506 binding protein 5	R1881	1.88	0
AB042410	GPR88	G protein-coupled receptor 88	R1881	1.35	0
AB035266	NRXN2	neurexin 2	R1881	0.91	0.048
NM_006006	ZBTB16	zinc finger and BTB domain containing 16	R1881	0.88	0
AF188747	KLK2	kallikrein-related peptidase 2	R1881	0.79	0
NM_012449	STEAP1	six transmembrane epithelial antigen of the prostate 1	R1881	0.79	0
AK001478	RHOU	ras homolog gene family member U	R1881	0.77	0
NM_020529	NFKBIA	nuclear factor of kappa light polypeptide gene enhancer in B-cells	R1881	0.74	0
NM_018674	ACCN4	amiloride-sensitive cation channel 4 pituitary	R1881	0.74	0
AL109698	ZNF710	zinc finger protein 710	R1881	0.71	0
AK001647	USP40	ubiquitin specific peptidase 40	R1881	0.68	0
AL360260	METRN	meteorin glial cell differentiation regulator	R1881	0.68	0
NM_004231	ATP6V1F	ATPase H transporting lysosomal 14kDa V1 subunit F	R1881	0.66	0.027
NM_017802	HEATR2	HEAT repeat containing 2	R1881	0.64	0
NM_016498	MTP18 *	Mitochondrial protein 18 kDa *	R1881	0.64	0
AL137384	KIAA1109	KIAA1109	R1881	0.63	0.027
NM_014606	HERC3	hect domain and RLD 3	R1881	0.62	0.048
Z21967	POU6F1	POU class 6 homeobox 1	R1881	0.62	0.039
NM_012099	CD3EAP	CD3e molecule epsilon associated protein	R1881	0.61	0
NM_005956	MTHFD1	Methylenetetrahydrofolate dehydrogenase (NADP+ dependent) 1	R1881	0.61	0
U36561	FUS	fusion involved in t 12 16 in malignant liposarcoma	R1881	0.6	0.027
AK024535	STAT3	signal transducer and activator of transcription 3 acute-phase	R1881	0.59	0
NM_006624	ZMYND11	zinc finger MYND domain containing 11	R1881	0.59	0.027
Y12018	PSEN1	presenilin 1 Alzheimer disease 3	R1881	0.59	0.027
NM_005081	ZNF142	zinc finger protein 142	R1881	0.58	0.048
AK022564	C14orf159	chromosome 14 open reading frame 159	R1881	0.57	0
NM_014848	SV2B	synaptic vesicle glycoprotein 2B	R1881	0.55	0
NM_003738	PTCH2	patched homolog 2 Drosophila	R1881	0.55	0.039
AJ002787	PRKCB1	protein kinase C beta 1	R1881	0.54	0
NM_012164	FBXW2	F-box and WD repeat domain containing 2	R1881	0.54	0.039
NM_006992	LRRC23	leucine rich repeat containing 23	R1881	0.53	0
NM_017772	TBC1D22B	TBC1 domain family member 22B	R1881	0.51	0.048
NM_006810	PDIA5	protein disulfide isomerase family A member 5	R1881	0.5	0
NM_015865	SLC14A1	solute carrier family 14 urea transporter member 1 Kidd blood group	R1881	0.5	0.048
NM_006869	CENTA1	centaurin alpha 1	R1881	0.49	0
NM_002493	NDUFB6	NADH dehydrogenase ubiquinone 1 beta subcomplex 6 17kDa	R1881	0.48	0.048
AB033023	YEATS2	YEATS domain containing 2	R1881	0.46	0.048
AK021498		hypothetical protein FLJ36031 *	R1881	0.44	0.027
AK001829	HSBP1L1	heat shock factor binding protein 1-like 1	R1881	0.42	0.027
NM_000844	GRM7	glutamate receptor metabotropic 7	R1881	0.42	0
NM_000855	GUCY1A2	guanylate cyclase 1 soluble alpha 2	R1881	0.35	0.048
NM_001741	CALCA	calcitonin/calcitonin-related polypeptide alpha	R1881	0.26	0.027
AF159093		Homo sapiens endogenous retrovirus RAN1 polymerase-like protein (pol)*	R1881	0.21	0.048
NM_016318	P2RX2	purinergic receptor P2X ligand-gated ion channel 2	Flutamide	-0.39	0
* no approved HUGO symbol / name exist for this entry. If present, gene symbol / name from the UNIGENE database are given in alternative.
